# Supplementary material for: The Crystal Structure of Nα-p-tosyl-lysyl Chloromethylketone-Bound Oligopeptidase B from Serratia Proteamaculans Revealed a New Type of Inhibitor Binding
Source: MDPI journal article supplement (doi:10.3390/cryst11111438), 2021-11-22
Supplement: s1 [file s1]

Archive with 1 entries (1 files):
- crystals-1454886-supplementary.pdf
