# Supplementary material for: The Crystal Structure of Nα-p-tosyl-lysyl Chloromethylketone-Bound Oligopeptidase B from Serratia Proteamaculans Revealed a New Type of Inhibitor Binding
Source: MDPI journal article supplement (doi:10.3390/cryst11111438), 2021-11-22
Supplement: s1 [file s1 › crystals-1454886-supplementary.pdf]

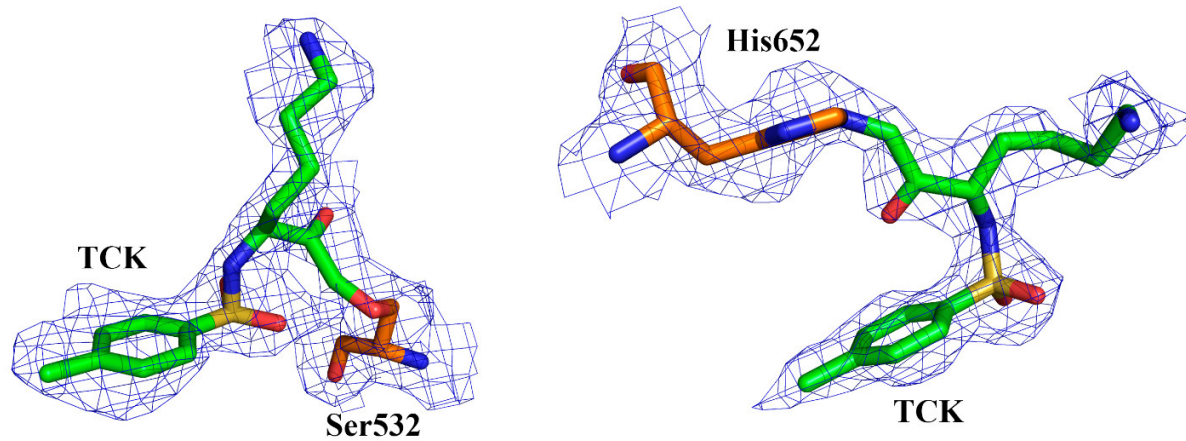

**Supplementary Figure S1.** The density maps of the TCK molecules covalently bound to the catalytic Ser532 and His652 residues of PSPmod.
